# Supplementary material for: Cross-metathesis of fatty acid derivatives with methyl acrylate: renewable raw materials for the chemical industry
Source: Royal Society of Chemistry journal article supplement (doi:10.1039/b712293d), 2007-01-01
Supplement: b712293d.pdf [file b712293d.pdf]

## Cross-metathesis of fatty acid derivatives with methyl acrylate: renewable raw materials for the chemical industry

Anastasiya Rybak and Michael A. R. Meier\*

University of Applied Sciences Oldenburg/Ostfriesland/Wilhelmshaven  
Constantiaplatz 4, 26723 Emden, Germany.  
E-mail: michael.meier@fh-oow.de; www.meier-michael.com

### 1. Additional gas chromatography results.

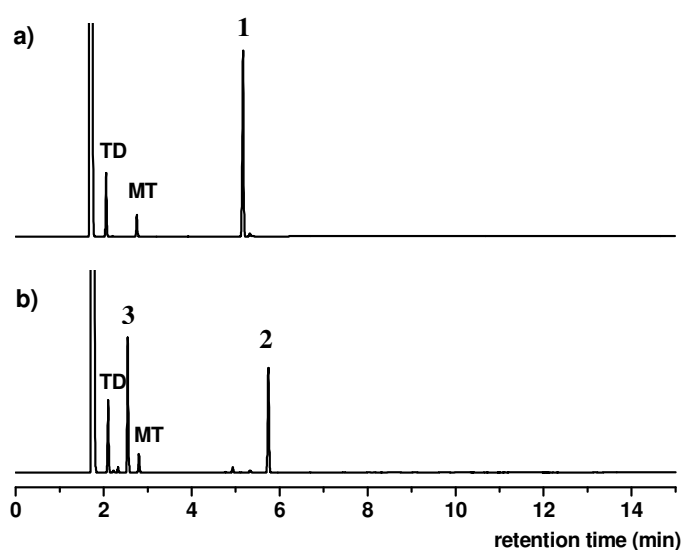

**Fig. 1** Gas chromatograms (GC/FID) of a) methyl oleate **1** starting material and b) cross-metathesis crude reaction mixture of **2** and **3** after 30 minutes reaction time ( $x = 10$ , 5 mol% **C3**); TD: tetradecane (internal standard), MT: (methyl-THF, solvent impurity).

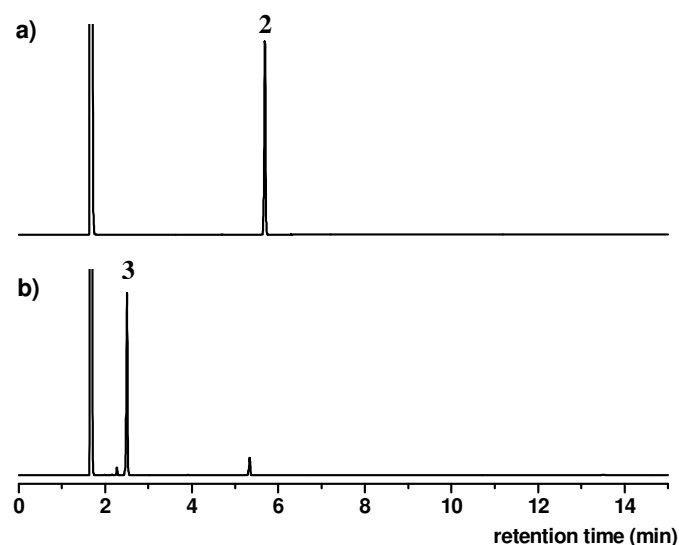

**Fig. 2** Gas chromatograms of cross-metathesis products after isolation *via* column chromatography; a) 1,1-Dimethyl-undec-2-enedioate **2** and b) 1-Methyl-undec-2-enoate **3**.

## 2. Analytic data.

### 1,4-Dimethyl-but-2-enedioate (**13**)

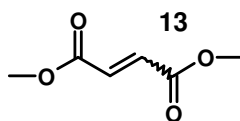

The isolated yield of **13** in all scale-up syntheses was 0.5-0.7 g (2.2-3.0 %).

IR (CH<sub>2</sub>Cl<sub>2</sub>):  $\nu$  2929, 2857, 1714, 1441, 1303, 1202, 1158, 991 cm<sup>-1</sup>.

<sup>1</sup>H NMR (300 MHz, CDCl<sub>3</sub>):  $\delta$  = 6.87 (s, 2H, -CH=CH-), 3.81 (s, 6H, 2COOCH<sub>3</sub>) ppm.

<sup>13</sup>C NMR (75.5 MHz, CDCl<sub>3</sub>):  $\delta$  = 165.3 (s, -COOCH<sub>3</sub>), 133.4 (s, -CH=CH-), 52.2 (s, COOCH<sub>3</sub>) ppm.

MS (EI):  $m/z$  (%) 144.1 (M<sup>+</sup>, 9), 113.0 (10), 84.0 (88), 58.1 (4), 49.0 (100).

MS (ESI-positive, CH<sub>2</sub>Cl<sub>2</sub>):  $m/z$  145.0 (MH<sup>+</sup>, calc. 145.05).
